# Supplementary material for: Artemisinin mimics calorie restriction to trigger mitochondrial biogenesis and compromise telomere shortening in mice
Source: PeerJ. 2015 Mar 5;3:e822. doi: 10.7717/peerj.822 (PMC4358698; doi:10.7717/peerj.822)
Supplement: Table S4 — Fold changes were calculated from the comparison of H2O2 with AL. [file peerj-03-822-s004.xls]

## Sheet: Gene Table
PCR Array Catalog #:		PAMM-079A		Open Gene Table in Web Browser
Position	UniGene	RefSeq	Symbol	Description	Gene Name
A01	Mm.103413	NM_026689	Mul1	Mitochondrial ubiquitin ligase activator of NFKB 1	0610009K11Rik, AV000801, Gide
A02	Mm.21645	NM_025389	Anapc11	Anaphase promoting complex subunit 11	1110011I19Rik, R75218
A03	Mm.291624	NM_175300	Anapc2	Anaphase promoting complex subunit 2	9230107K09Rik, AL024279, Apc2, Emi4, Imi4, mKIAA1406
A04	Mm.305925	NM_019927	Arih1	Ariadne ubiquitin-conjugating enzyme E2 binding protein homolog 1 (Drosophila)	AU021774, Ari, Ari1, Hari, Hhari, Ubch7bp, Uip77
A05	Mm.275332	NM_028835	Atg7	Autophagy-related 7 (yeast)	1810013K23Rik, Agp7, Apg7l, Atg7l
A06	Mm.10764	NM_007525	Bard1	BRCA1 associated RING domain 1	ENSMUSG00000060893, ENSMUSG00000073653
A07	Mm.244975	NM_009764	Brca1	Breast cancer 1	-
A08	Mm.226957	NM_145956	Brcc3	BRCA1/BRCA2-containing complex, subunit 3	C6.1A, MGC29148
A09	Mm.119717	NM_009771	Btrc	Beta-transducin repeat containing protein	Beta-Trcp1, FWD1, Fbw1a, HOS, KIAA4123, Slimb, b-TrCP, beta-TrCP, mKIAA4123
A10	Mm.266871	NM_007619	Cbl	Casitas B-lineage lymphoma	4732447J05Rik, Cbl-2, c-Cbl, cbl
A11	Mm.21981	NM_177613	Cdc34	Cell division cycle 34 homolog (S. cerevisiae)	AI327276, UBE2R1
A12	Mm.87611	NM_012042	Cul1	Cullin 1	-
B01	Mm.291707	NM_029402	Cul2	Cullin 2	1300003D18Rik, 4932411N15Rik, AI327301, KIAA4106, mKIAA4106
B02	Mm.12665	NM_016716	Cul3	Cullin 3	AI467304, AW146203, mKIAA0617
B03	Mm.212861	NM_146207	Cul4a	Cullin 4A	2810470J21Rik, AW495282, MGC36573
B04	Mm.327675	NM_028288	Cul4b	Cullin 4B	2700050M05Rik, AA409770, KIAA0695, mKIAA0695
B05	Mm.218910	NM_027807	Cul5	Cullin 5	4921514I20Rik, 8430423K24Rik, AI852817, C030032G03Rik, C330021I08Rik, VACM-1, VACM1
B06	Mm.329078	NM_025611	Cul7	Cullin 7	2510004L20Rik, AA409809, C230011P08Rik, p185, p193
B07	Mm.289915	NM_015735	Ddb1	Damage specific DNA binding protein 1	127kDa, AA408517, p127-Ddb1
B08	Mm.275138	NM_001110017	Dzip3	DAZ interacting protein 3, zinc finger	2310047C04Rik, 2A-HUB, 6430549P11Rik, A230104G20
B09	Mm.143768	NM_020593	Fbxo3	F-box protein 3	1200002G09Rik, 1700026K02Rik, AI046358, Fba
B10	Mm.467749	NM_133765	Fbxo31	F-box protein 31	2310046N15Rik, Fbx14, Fbxo14
B11	Mm.234191	NM_134099	Fbxo4	F-box protein 4	1700096C12Rik, AI851261, AW494535, Fbx4
B12	Mm.482259	NM_001033669	Fbxw10	F-box and WD-40 domain protein 10	Fbw10, HREP, SM25H2, SM2SH2
C01	Mm.374815	NM_026791	Fbxw9	F-box and WD-40 domain protein 9	1110017H11Rik, Fbw9, MGC7678
C02	Mm.125298	NM_001081348	Hecw1	HECT, C2 and WW domain containing E3 ubiquitin protein ligase 1	9330116H24Rik, AV273951, E130207I19Rik, Nedl1
C03	Mm.132150	NM_172655	Hecw2	HECT, C2 and WW domain containing E3 ubiquitin protein ligase 2	A730039N16Rik, D030049F17Rik, Gm971, Nedl2, mKIAA1301
C04	Mm.297393	NM_025992	Herc6	Hect domain and RLD 6	1700121D12Rik, 2510038N07Rik, 4930427L17Rik, AI451296, CEB1, Herc5, KIAA0032
C05	Mm.27372	NM_021523	Huwe1	HECT, UBA and WWE domain containing 1	5430439H10Rik, AU041296, Arf-bp1, C430014N20Rik, C80292, Gm1718, Ib772, LASU1, Mule, Ureb1
C06	Mm.175989	NM_027314	March5	Membrane-associated ring finger (C3HC4) 5	1810015H18Rik, 2310008I22Rik, 2700055A20Rik, 5730499H23Rik, E130202O05Rik, MARCH-V, MGC130121, MGC130122, Marchv, Rnf153
C07	Mm.22670	NM_010786	Mdm2	Transformed mouse 3T3 cell double minute 2	1700007J15Rik, AA415488, Mdm-2
C08	Mm.21500	NM_144860	Mib1	Mindbomb homolog 1 (Drosophila)	DIP-1, E430019M12Rik, MGC18948, Mib, mKIAA1323
C09	Mm.482182	XM_130596	Mocs3	Molybdenum cofactor synthesis 3	1700020H17Rik, Uba4
C10	Mm.237670	NM_144931	Nae1	NEDD8 activating enzyme E1 subunit 1	59kDa, Appbp1, MGC29435, MGC36437, MGC36630
C11	Mm.296566	NM_008683	Nedd8	Neural precursor cell expressed, developmentally down-regulated gene 8	Rub1
C12	Mm.329076	NM_001081335	Cul9	Cullin 9	1810035I07Rik, Parc, mKIAA0708
D01	Mm.311110	NM_016694	Park2	Parkinson disease (autosomal recessive, juvenile) 2, parkin	MGC130518, PRKN
D02	Mm.328135	NM_011931	Rfwd2	Ring finger and WD repeat domain 2	AI316802, C80879, Cop1
D03	Mm.379272	NM_032543	Rnf123	Ring finger protein 123	BC003945, Kpc1
D04	Mm.443309	NM_027754	Rnf148	Ring finger protein 148	4933432M07Rik, Greul3
D05	Mm.258530	NM_019748	Sae1	SUMO1 activating enzyme subunit 1	2400010M20Rik, 2610044L12Rik, AL033372, AOS1, AW743391, D7Ertd177e, HSPC140, Sua1, Uble1a
D06	Mm.42944	NM_011543	Skp1a	S-phase kinase-associated protein 1A	15kDa, 2610043E24Rik, 2610206H23Rik, EMC19, OCP-II, OCP2, SKP1, Tceb1l, p19A, p19Skp1
D07	Mm.35584	NM_013787	Skp2	S-phase kinase-associated protein 2 (p45)	FBXL1, MGC102075, MGC116668
D08	Mm.27735	NM_029438	Smurf1	SMAD specific E3 ubiquitin protein ligase 1	4930431E10Rik, mKIAA1625
D09	Mm.340955	NM_025481	Smurf2	SMAD specific E3 ubiquitin protein ligase 2	2810411E22Rik, AI558114, AI649275
D10	Mm.277599	NM_019719	Stub1	STIP1 homology and U-Box containing protein 1	0610033N24Rik, 2210017D18Rik, 2310040B03Rik, AW046544, Chip
D11	Mm.149870	NM_028769	Syvn1	Synovial apoptosis inhibitor 1, synoviolin	1200010C09Rik, AW211966, C85322, D530017H19Rik, Hrd1
D12	Mm.4863	NM_145538	Tmem189	Transmembrane protein 189	AI840826, Kua
E01	Mm.222	NM_011640	Trp53	Transformation related protein 53	Tp53, bbl, bfy, bhy, p44, p53
E02	Mm.1104	NM_009457	Uba1	Ubiquitin-like modifier activating enzyme 1	A1S9, AA989744, Sbx, Ube-1, Ube1x
E03	Mm.27560	NM_016682	Uba2	Ubiquitin-like modifier activating enzyme 2	AA986091, Arx, Sae2, UBA1, Ubl1a2, Uble1b
E04	Mm.277626	NM_011666	Uba3	Ubiquitin-like modifier activating enzyme 3	A830034N06Rik, AI256736, AI848246, AW546539, Ube1c
E05	Mm.224935	NM_025692	Uba5	Ubiquitin-like modifier activating enzyme 5	5730525G14Rik, AW240750, Ube1dc1
E06	Mm.34012	NM_172712	Uba6	Ubiquitin-like modifier activating enzyme 6	4930542H01, 5730469D23Rik, AU021846, AW124799, E1-L2, Ube1l2
E07	Mm.395649	NM_019668	Ube2a	Ubiquitin-conjugating enzyme E2A, RAD6 homolog (S. cerevisiae)	HHR6A, HR6A, Mhr6a
E08	Mm.384918	NM_009458	Ube2b	Ubiquitin-conjugating enzyme E2B, RAD6 homology (S. cerevisiae)	2610301N02Rik, E2-14k, HR6B, Rad6b, mHR6B
E09	Mm.89830	NM_026785	Ube2c	Ubiquitin-conjugating enzyme E2C	1110015A16Rik, D2Ertd695e
E10	Mm.270530	NM_145420	Ube2d1	Ubiquitin-conjugating enzyme E2D 1, UBC4/5 homolog (yeast)	MGC28550, UBCH5
E11	Mm.180052	NM_019912	Ube2d2	Ubiquitin-conjugating enzyme E2D 2	1500034D03Rik, Ubc2e, ubc4
E12	Mm.49884	NM_025356	Ube2d3	Ubiquitin-conjugating enzyme E2D 3 (UBC4/5 homolog, yeast)	1100001F19Rik, 9430029A22Rik, AA414951
F01	Mm.4429	NM_009455	Ube2e1	Ubiquitin-conjugating enzyme E2E 1, UBC4/5 homolog (yeast)	UbcM3, Ubce5, ubcM2
F02	Mm.23551	NM_144839	Ube2e2	Ubiquitin-conjugating enzyme E2E 2 (UBC4/5 homolog, yeast)	BC016265, MGC28917
F03	Mm.1485	NM_009454	Ube2e3	Ubiquitin-conjugating enzyme E2E 3, UBC4/5 homolog (yeast)	Ubce4, ubcM2
F04	Mm.458052	NM_025985	Ube2g1	Ubiquitin-conjugating enzyme E2G 1 (UBC7 homolog, C. elegans)	2700059C12Rik, AI256795, AU014992, AW552068, D130023C12Rik
F05	Mm.458125	NM_019803	Ube2g2	Ubiquitin-conjugating enzyme E2G 2	1110003O05Rik, D10Xrf369, UBC7, Ubc7p
F06	Mm.332967	NM_009459	Ube2h	Ubiquitin-conjugating enzyme E2H	1500009C23Rik, AI181839, AI326965, AI462483, AW227540, E2-20K, N28148, Ubc8
F07	Mm.240044	NM_011665	Ube2i	Ubiquitin-conjugating enzyme E2I	5830467E05Rik, F830028O17Rik, UBC9, Ubce2i, Ubce9
F08	Mm.259095	NM_019586	Ube2j1	Ubiquitin-conjugating enzyme E2, J1	0710008M05Rik, 1110030I22Rik, NCUBE-1, Ncube, Ncube1, Ubc6p
F09	Mm.371673	NM_001039157	Ube2j2	Ubiquitin-conjugating enzyme E2, J2 homolog (yeast)	1200007B18Rik, 2400008G19Rik, 5730472G04Rik, AL022923, NCUBE-2, Ubc6, Ubc6p
F10	Mm.319512	NM_016786	Ube2k	Ubiquitin-conjugating enzyme E2K (UBC1 homolog, yeast)	AW492011, D5Ertd601e, E2-25k, Hip2, Hypg, Lig
F11	Mm.3074	NM_009456	Ube2l3	Ubiquitin-conjugating enzyme E2L 3	C79827, MGC118100, UbcM4, Ubce7
F12	Mm.196580	NM_145578	Ube2m	Ubiquitin-conjugating enzyme E2M (UBC12 homolog, yeast)	2510040H03Rik, MGC25453, MGC37197, UBC12, Ubc-rs2
G01	Mm.371667	NM_080560	Ube2n	Ubiquitin-conjugating enzyme E2N	1500026J17Rik, AL022654, BB101821, UBC13
G02	Mm.41438	NM_027315	Ube2q1	Ubiquitin-conjugating enzyme E2Q (putative) 1	1110002C01Rik, 2310012M18Rik, AI854014, Gtap, NICE-5, PRO3094, Ube2q
G03	Mm.389540	NM_026275	Ube2r2	Ubiquitin-conjugating enzyme E2R 2	1200003M11Rik, Cdc34b, Ubc3b
G04	Mm.389787	NM_133777	Ube2s	Ubiquitin-conjugating enzyme E2S	0910001J09Rik, 6720465F12Rik, AA409170, E2-EPF, MGC101982
G05	Mm.284587	NM_026024	Ube2t	Ubiquitin-conjugating enzyme E2T (putative)	2700084L22Rik, C80607
G06	Mm.122430	NM_025773	Ube2w	Ubiquitin-conjugating enzyme E2W (putative)	6130401J04Rik
G07	Mm.38802	NM_172300	Ube2z	Ubiquitin-conjugating enzyme E2Z (putative)	AW049199, C030047H17Rik, D11Moh35
G08	Mm.393991	NM_022022	Ube4b	Ubiquitination factor E4B, UFD2 homolog (S. cerevisiae)	4930551I19Rik, 4933406G05Rik, AU014668, D4Bwg0973e, UFD2, UFD2a, Ufd2p, mKIAA0684
G09	Mm.389330	NM_009461	Ubr1	Ubiquitin protein ligase E3 component n-recognin 1	AI504731
G10	Mm.28234	NM_146078	Ubr2	Ubiquitin protein ligase E3 component n-recognin 2	9930021A08Rik, AI462103, AW540746, E130209G04Rik, KIAA0349, MGC36320, mKIAA0349
G11	Mm.29407	NM_009507	Vhl	Von Hippel-Lindau tumor suppressor	Vhlh
G12	Mm.78312	NM_177327	Wwp1	WW domain containing E3 ubiquitin protein ligase 1	8030445B08Rik, AIP5, SDRP1, Tiul1
H01	Mm.3317	NM_010368	Gusb	Glucuronidase, beta	AI747421, Gur, Gus, Gus-r, Gus-s, Gus-t, Gus-u, Gut, asd, g
H02	Mm.299381	NM_013556	Hprt	Hypoxanthine guanine phosphoribosyl transferase	C81579, HPGRT, Hprt1, MGC103149
H03	Mm.2180	NM_008302	Hsp90ab1	Heat shock protein 90 alpha (cytosolic), class B member 1	90kDa, AL022974, C81438, Hsp84, Hsp84-1, Hsp90, Hspcb, MGC115780
H04	Mm.343110	NM_008084	Gapdh	Glyceraldehyde-3-phosphate dehydrogenase	Gapd, MGC102544, MGC102546, MGC103190, MGC103191, MGC105239
H05	Mm.328431	NM_007393	Actb	Actin, beta	Actx, E430023M04Rik, beta-actin
H06	N/A	SA_00106	MGDC	Mouse Genomic DNA Contamination	MIGX1B
H07	N/A	SA_00104	RTC	Reverse Transcription Control	RTC
H08	N/A	SA_00104	RTC	Reverse Transcription Control	RTC
H09	N/A	SA_00104	RTC	Reverse Transcription Control	RTC
H10	N/A	SA_00103	PPC	Positive PCR Control	PPC
H11	N/A	SA_00103	PPC	Positive PCR Control	PPC
H12	N/A	SA_00103	PPC	Positive PCR Control	PPC

## Sheet: Test Sample Data
Symbol	Well	H2O2													Ct Range	Distribution of Ct Values										AVG	STD
		exp1	exp2	exp3	exp4	exp5	exp6	exp7	exp8	exp9	exp10	AVG	SD			exp1	exp2	exp3	exp4	exp5	exp6	exp7	exp8	exp9	exp10
Mul1	A01	23.2165										23.2165			<25	82										82	#DIV/0!
Anapc11	A02	20.5644										20.5644			25-30	10										10	#DIV/0!
Anapc2	A03	21.4742										21.4742			30-35	0										0	#DIV/0!
Arih1	A04	19.8444										19.8444			Absent Calls	4										4	#DIV/0!
Atg7	A05	22.9218										22.9218			Percent Distribution of Ct Values
Bard1	A06	27.1612										27.1612			<25	0.854167										0.854167	#DIV/0!
Brca1	A07	27.4612										27.4612			25-30	0.104167										0.104167	#DIV/0!
Brcc3	A08	22.592										22.592			30-35	0										0	#DIV/0!
Btrc	A09	23.2279										23.2279			Absent Calls	0.0416667										0.0416667	#DIV/0!
Cbl	A10	23.3692										23.3692
Cdc34	A11	18.8627										18.8627
Cul1	A12	20.9923										20.9923
Cul2	B01	20.6042										20.6042
Cul3	B02	19.3593										19.3593
Cul4a	B03	21.2926										21.2926
Cul4b	B04	23.6724										23.6724
Cul5	B05	21.5118										21.5118
Cul7	B06	25.3194										25.3194
Ddb1	B07	21.4159										21.4159
Dzip3	B08	24.8689										24.8689
Fbxo3	B09	21.3595										21.3595
Fbxo31	B10	21.7264										21.7264
Fbxo4	B11	21.7602										21.7602
Fbxw10	B12	26.5789										26.5789
Fbxw9	C01	22.9302										22.9302
Hecw1	C02	26.7155										26.7155
Hecw2	C03	27.4166										27.4166
Herc6	C04	21.4216										21.4216
Huwe1	C05	20.1603										20.1603
March5	C06	20.3654										20.3654
Mdm2	C07	19.3482										19.3482
Mib1	C08	22.7897										22.7897
Mocs3	C09	24.9447										24.9447
Nae1	C10	21.2227										21.2227
Nedd8	C11	19.1915										19.1915
Cul9	C12	27.4855										27.4855
Park2	D01	23.7619										23.7619
Rfwd2	D02	24.6845										24.6845
Rnf123	D03	20.7894										20.7894
Rnf148	D04	26.9607										26.9607
Sae1	D05	20.456										20.456
Skp1a	D06	22.9364										22.9364
Skp2	D07	26.7485										26.7485
Smurf1	D08	24.8471										24.8471
Smurf2	D09	22.3145										22.3145
Stub1	D10	20.5554										20.5554
Syvn1	D11	24.8961										24.8961
Tmem189	D12	21.5622										21.5622
Trp53	E01	21.3236										21.3236
Uba1	E02	18.8471										18.8471
Uba2	E03	20.4201										20.4201
Uba3	E04	20.3678										20.3678
Uba5	E05	22.0179										22.0179
Uba6	E06	23.2116										23.2116
Ube2a	E07	21.5507										21.5507
Ube2b	E08	17.8207										17.8207
Ube2c	E09	23.9894										23.9894
Ube2d1	E10	19.4769										19.4769
Ube2d2	E11	21.6611										21.6611
Ube2d3	E12	17.5456										17.5456
Ube2e1	F01	19.5572										19.5572
Ube2e2	F02	24.7192										24.7192
Ube2e3	F03	21.0084										21.0084
Ube2g1	F04	21.8454										21.8454
Ube2g2	F05	21.8579										21.8579
Ube2h	F06	21.9623										21.9623
Ube2i	F07	19.2642										19.2642
Ube2j1	F08	21.5681										21.5681
Ube2j2	F09	26.8329										26.8329
Ube2k	F10	23.3834										23.3834
Ube2l3	F11	20.2122										20.2122
Ube2m	F12	21.7126										21.7126
Ube2n	G01	22.6805										22.6805
Ube2q1	G02	20.6179										20.6179
Ube2r2	G03	18.9821										18.9821
Ube2s	G04	20.0931										20.0931
Ube2t	G05	24.4952										24.4952
Ube2w	G06	21.856										21.856
Ube2z	G07	24.8031										24.8031
Ube4b	G08	22.5213										22.5213
Ubr1	G09	23.047										23.047
Ubr2	G10	22.1776										22.1776
Vhl	G11	22.2852										22.2852
Wwp1	G12	21.2965										21.2965
Gusb	H01	21.4607										21.4607
Hprt	H02	20.5333										20.5333
Hsp90ab1	H03	16.6896										16.6896
Gapdh	H04	14.9167										14.9167
Actb	H05	19.0067										19.0067
MGDC	H06	Undetermined										35
RTC	H07	Undetermined										35
RTC	H08	Undetermined										35
RTC	H09	Undetermined										35
PPC	H10	18.8049										18.8049
PPC	H11	18.6573										18.6573
PPC	H12	18.9286										18.9286
Note: If there are fewer than 3 data points, the standard deviation (SD) will appear as "N/A".

## Sheet: Control Sample Data
Symbol	Well	AL2													Ct Range	Distribution of Ct Values										AVG	STD
		exp1	exp2	exp3	exp4	exp5	exp6	exp7	exp8	exp9	exp10	AVG	SD			exp1	exp2	exp3	exp4	exp5	exp6	exp7	exp8	exp9	exp10
Mul1	A01	23.1471										23.1471			<25	86										86	#DIV/0!
Anapc11	A02	20.0287										20.0287			25-30	4										4	#DIV/0!
Anapc2	A03	20.8858										20.8858			30-35	2										2	#DIV/0!
Arih1	A04	20.1251										20.1251			Absent Calls	4										4	#DIV/0!
Atg7	A05	21.5567										21.5567			Percent Distribution of Ct Values
Bard1	A06	25.5354										25.5354			<25	0.895833										0.895833	#DIV/0!
Brca1	A07	22.9374										22.9374			25-30	0.0416667										0.0416667	#DIV/0!
Brcc3	A08	22.0706										22.0706			30-35	0.0208333										0.0208333	#DIV/0!
Btrc	A09	21.3023										21.3023			Absent Calls	0.0416667										0.0416667	#DIV/0!
Cbl	A10	21.3943										21.3943
Cdc34	A11	18.9261										18.9261
Cul1	A12	20.9554										20.9554
Cul2	B01	20.7191										20.7191
Cul3	B02	19.2129										19.2129
Cul4a	B03	20.535										20.535
Cul4b	B04	23.0755										23.0755
Cul5	B05	21.6009										21.6009
Cul7	B06	22.7106										22.7106
Ddb1	B07	20.0804										20.0804
Dzip3	B08	23.8587										23.8587
Fbxo3	B09	20.9483										20.9483
Fbxo31	B10	21.5098										21.5098
Fbxo4	B11	22.2977										22.2977
Fbxw10	B12	26.6205										26.6205
Fbxw9	C01	22.3153										22.3153
Hecw1	C02	32.4683										32.4683
Hecw2	C03	26.8245										26.8245
Herc6	C04	24.3722										24.3722
Huwe1	C05	20.0068										20.0068
March5	C06	21.2135										21.2135
Mdm2	C07	19.6724										19.6724
Mib1	C08	20.709										20.709
Mocs3	C09	24.3103										24.3103
Nae1	C10	20.765										20.765
Nedd8	C11	18.7843										18.7843
Cul9	C12	24.4071										24.4071
Park2	D01	22.8799										22.8799
Rfwd2	D02	23.4469										23.4469
Rnf123	D03	19.7283										19.7283
Rnf148	D04	31.7539										31.7539
Sae1	D05	19.9472										19.9472
Skp1a	D06	19.7034										19.7034
Skp2	D07	24.228										24.228
Smurf1	D08	22.8325										22.8325
Smurf2	D09	21.4819										21.4819
Stub1	D10	20.0799										20.0799
Syvn1	D11	21.4487										21.4487
Tmem189	D12	21.4356										21.4356
Trp53	E01	20.2495										20.2495
Uba1	E02	18.7556										18.7556
Uba2	E03	19.5682										19.5682
Uba3	E04	19.9196										19.9196
Uba5	E05	21.6419										21.6419
Uba6	E06	23.0903										23.0903
Ube2a	E07	21.2937										21.2937
Ube2b	E08	17.7757										17.7757
Ube2c	E09	18.5373										18.5373
Ube2d1	E10	19.121										19.121
Ube2d2	E11	21.3558										21.3558
Ube2d3	E12	17.9153										17.9153
Ube2e1	F01	19.8749										19.8749
Ube2e2	F02	24.6468										24.6468
Ube2e3	F03	19.9325										19.9325
Ube2g1	F04	21.2934										21.2934
Ube2g2	F05	20.8791										20.8791
Ube2h	F06	20.1789										20.1789
Ube2i	F07	18.5169										18.5169
Ube2j1	F08	20.7609										20.7609
Ube2j2	F09	27.3309										27.3309
Ube2k	F10	23.1339										23.1339
Ube2l3	F11	19.81										19.81
Ube2m	F12	20.6869										20.6869
Ube2n	G01	22.743										22.743
Ube2q1	G02	19.8182										19.8182
Ube2r2	G03	18.5329										18.5329
Ube2s	G04	18.5381										18.5381
Ube2t	G05	22.7877										22.7877
Ube2w	G06	22.5257										22.5257
Ube2z	G07	24.3843										24.3843
Ube4b	G08	21.9921										21.9921
Ubr1	G09	22.9391										22.9391
Ubr2	G10	21.803										21.803
Vhl	G11	21.5674										21.5674
Wwp1	G12	20.7583										20.7583
Gusb	H01	20.2545										20.2545
Hprt	H02	19.9953										19.9953
Hsp90ab1	H03	16.7188										16.7188
Gapdh	H04	13.7981										13.7981
Actb	H05	15.3577										15.3577
MGDC	H06	Undetermined										35
RTC	H07	Undetermined										35
RTC	H08	Undetermined										35
RTC	H09	Undetermined										35
PPC	H10	18.5398										18.5398
PPC	H11	18.5078										18.5078
PPC	H12	18.6036										18.6036
Note: If there are fewer than 3 data points, the standard deviation (SD) will appear as "N/A".

## Sheet: Choose Housekeeping Genes
Housekeeping Gene Symbol		Well	H2O2											Housekeeping Gene Symbol		Well	AL2
			exp1	exp2	exp3	exp4	exp5	exp6	exp7	exp8	exp9	exp10					exp1	exp2	exp3	exp4	exp5	exp6	exp7	exp8	exp9	exp10
Hsp90ab1		H03	16.6896											Hsp90ab1		H03	16.7188
		AVG	16.6896													AVG	16.7188

## Sheet: Results
Symbol	Well	AVG ΔCt (Ct(GOI) - Ave Ct (HKG))		2^-ΔCt		Fold Change	T-TEST	Fold Up- or Down-Regulation	Comments
		H2O2	AL2	H2O2	AL2	H2O2 /AL2	p value	H2O2 /AL2
Mul1	A01	6.52696	6.42828	0.010844	0.0116117	0.933889	N/A	-1.07079	OKAY
Anapc11	A02	3.87478	3.30982	0.0681672	0.100843	0.675975	N/A	-1.47934	OKAY
Anapc2	A03	4.78458	4.16694	0.0362827	0.0556706	0.651738	N/A	-1.53436	OKAY
Arih1	A04	3.15486	3.40629	0.112277	0.0943201	1.19039	N/A	1.19039	OKAY
Atg7	A05	6.23224	4.8379	0.0133018	0.0349662	0.380418	N/A	-2.62869	OKAY
Bard1	A06	10.4716	8.8165	0.00070425	0.00221803	0.317511	N/A	-3.1495	OKAY
Brca1	A07	10.7716	6.21854	0.000572038	0.0134287	0.0425982	N/A	-23.4752	OKAY
Brcc3	A08	5.90246	5.35178	0.0167179	0.024488	0.682698	N/A	-1.46478	OKAY
Btrc	A09	6.53831	4.58347	0.010759	0.0417098	0.257949	N/A	-3.87673	OKAY
Cbl	A10	6.67966	4.67544	0.00975485	0.0391337	0.24927	N/A	-4.01171	OKAY
Cdc34	A11	2.1731	2.20729	0.221734	0.21654	1.02399	N/A	1.02399	OKAY
Cul1	A12	4.30275	4.23653	0.0506691	0.0530489	0.955139	N/A	-1.04697	OKAY
Cul2	B01	3.91458	4.00029	0.0663122	0.0624877	1.0612	N/A	1.0612	OKAY
Cul3	B02	2.66976	2.49407	0.157152	0.177505	0.885343	N/A	-1.12951	OKAY
Cul4a	B03	4.60297	3.81613	0.0411497	0.0709954	0.579611	N/A	-1.72529	OKAY
Cul4b	B04	6.98283	6.35662	0.00790603	0.012203	0.647876	N/A	-1.5435	OKAY
Cul5	B05	4.82223	4.88208	0.0353479	0.0339116	1.04236	N/A	1.04236	OKAY
Cul7	B06	8.62984	5.99176	0.0025244	0.0157145	0.160641	N/A	-6.22505	OKAY
Ddb1	B07	4.72634	3.36157	0.0377773	0.0972894	0.388298	N/A	-2.57534	OKAY
Dzip3	B08	8.17931	7.13985	0.0034497	0.00709071	0.48651	N/A	-2.05546	OKAY
Fbxo3	B09	4.66988	4.22946	0.0392849	0.0533098	0.736917	N/A	-1.357	OKAY
Fbxo31	B10	5.03683	4.79099	0.0304623	0.0361216	0.843327	N/A	-1.18578	OKAY
Fbxo4	B11	5.07065	5.57882	0.0297565	0.0209223	1.42224	N/A	1.42224	OKAY
Fbxw10	B12	9.88929	9.90167	0.00105445	0.00104545	1.00862	N/A	1.00862	OKAY
Fbxw9	C01	6.2406	5.59644	0.0132249	0.0206683	0.639864	N/A	-1.56283	OKAY
Hecw1	C02	10.0259	15.7494	0.000959175	1.81531e-05	52.8382	N/A	52.8382	A
Hecw2	C03	10.727	10.1057	0.000590005	0.000907573	0.650091	N/A	-1.53825	OKAY
Herc6	C04	4.732	7.65332	0.0376294	0.0049673	7.57543	N/A	7.57543	OKAY
Huwe1	C05	3.47069	3.28791	0.0902026	0.102386	0.881006	N/A	-1.13507	OKAY
March5	C06	3.67579	4.49461	0.0782486	0.0443596	1.76396	N/A	1.76396	OKAY
Mdm2	C07	2.6586	2.95351	0.158373	0.129093	1.22681	N/A	1.22681	OKAY
Mib1	C08	6.10016	3.99012	0.014577	0.0629295	0.23164	N/A	-4.31704	OKAY
Mocs3	C09	8.25513	7.59146	0.00327308	0.00518494	0.631268	N/A	-1.58411	OKAY
Nae1	C10	4.53316	4.04611	0.04319	0.0605341	0.713482	N/A	-1.40158	OKAY
Nedd8	C11	2.50195	2.06544	0.176538	0.238913	0.738922	N/A	-1.35332	OKAY
Cul9	C12	10.7959	7.68823	0.000562469	0.00484857	0.116007	N/A	-8.62014	OKAY
Park2	D01	7.0723	6.16103	0.00743065	0.0139748	0.531719	N/A	-1.88069	OKAY
Rfwd2	D02	7.99487	6.72804	0.00392015	0.00943315	0.415572	N/A	-2.40632	OKAY
Rnf123	D03	4.09981	3.00945	0.0583222	0.124184	0.469643	N/A	-2.12928	OKAY
Rnf148	D04	10.2712	15.035	0.000809235	2.97859e-05	27.1684	N/A	27.1684	A
Sae1	D05	3.76643	3.22837	0.0734836	0.1067	0.688696	N/A	-1.45202	OKAY
Skp1a	D06	6.24685	2.98458	0.0131678	0.126343	0.104222	N/A	-9.59489	OKAY
Skp2	D07	10.0589	7.50915	0.000937465	0.00548935	0.170779	N/A	-5.85552	OKAY
Smurf1	D08	8.15755	6.11367	0.00350214	0.0144412	0.242511	N/A	-4.12352	OKAY
Smurf2	D09	5.62494	4.76309	0.020264	0.036827	0.550249	N/A	-1.81736	OKAY
Stub1	D10	3.86579	3.36106	0.0685931	0.0973238	0.704793	N/A	-1.41886	OKAY
Syvn1	D11	8.20655	4.72986	0.00338519	0.0376852	0.0898282	N/A	-11.1324	OKAY
Tmem189	D12	4.87258	4.71673	0.0341355	0.0380298	0.8976	N/A	-1.11408	OKAY
Trp53	E01	4.63404	3.53065	0.040273	0.0865306	0.46542	N/A	-2.1486	OKAY
Uba1	E02	2.15752	2.03675	0.22414	0.243711	0.919696	N/A	-1.08732	OKAY
Uba2	E03	3.73049	2.84933	0.0753376	0.138761	0.542932	N/A	-1.84185	OKAY
Uba3	E04	3.6782	3.20073	0.0781181	0.108763	0.718239	N/A	-1.3923	OKAY
Uba5	E05	5.3283	4.92305	0.0248899	0.032962	0.755107	N/A	-1.32432	OKAY
Uba6	E06	6.52198	6.37149	0.0108815	0.0120779	0.900944	N/A	-1.10995	OKAY
Ube2a	E07	4.86116	4.57485	0.0344069	0.0419598	0.819997	N/A	-1.21952	OKAY
Ube2b	E08	1.13115	1.0569	0.456551	0.480665	0.949831	N/A	-1.05282	OKAY
Ube2c	E09	7.29982	1.81849	0.00634652	0.283517	0.022385	N/A	-44.6729	OKAY
Ube2d1	E10	2.78733	2.4021	0.144854	0.189189	0.765657	N/A	-1.30607	OKAY
Ube2d2	E11	4.97147	4.637	0.0318741	0.0401907	0.793072	N/A	-1.26092	OKAY
Ube2d3	E12	0.856055	1.19641	0.552461	0.43636	1.26607	N/A	1.26607	OKAY
Ube2e1	F01	2.86762	3.15607	0.137012	0.112183	1.22133	N/A	1.22133	OKAY
Ube2e2	F02	8.02957	7.92793	0.003827	0.00410633	0.931974	N/A	-1.07299	OKAY
Ube2e3	F03	4.31878	3.21368	0.0501094	0.107792	0.464872	N/A	-2.15113	OKAY
Ube2g1	F04	5.15583	4.5746	0.0280504	0.0419671	0.668391	N/A	-1.49613	OKAY
Ube2g2	F05	5.16828	4.16023	0.0278095	0.0559303	0.497217	N/A	-2.0112	OKAY
Ube2h	F06	5.27274	3.46004	0.0258671	0.0908708	0.284658	N/A	-3.51298	OKAY
Ube2i	F07	2.57463	1.79806	0.167864	0.28756	0.583754	N/A	-1.71305	OKAY
Ube2j1	F08	4.87854	4.04202	0.0339947	0.060706	0.55999	N/A	-1.78575	OKAY
Ube2j2	F09	10.1433	10.6121	0.000884231	0.000638931	1.38392	N/A	1.38392	OKAY
Ube2k	F10	6.69377	6.41508	0.00965994	0.0117184	0.824337	N/A	-1.2131	OKAY
Ube2l3	F11	3.52258	3.09112	0.0870156	0.117349	0.741508	N/A	-1.3486	OKAY
Ube2m	F12	5.023	3.96809	0.0307558	0.0638977	0.481328	N/A	-2.07758	OKAY
Ube2n	G01	5.9909	6.02417	0.0157239	0.0153654	1.02333	N/A	1.02333	OKAY
Ube2q1	G02	3.92828	3.09933	0.0656854	0.116683	0.562937	N/A	-1.7764	OKAY
Ube2r2	G03	2.29247	1.81404	0.204126	0.284393	0.71776	N/A	-1.39322	OKAY
Ube2s	G04	3.40353	1.81928	0.0945008	0.283363	0.333497	N/A	-2.99853	OKAY
Ube2t	G05	7.80563	6.06881	0.00446962	0.0148973	0.300029	N/A	-3.33301	OKAY
Ube2w	G06	5.16639	5.80684	0.027846	0.0178635	1.55882	N/A	1.55882	OKAY
Ube2z	G07	8.11349	7.66547	0.00361073	0.00492564	0.733049	N/A	-1.36417	OKAY
Ube4b	G08	5.8317	5.27323	0.0175584	0.0258583	0.679022	N/A	-1.47271	OKAY
Ubr1	G09	6.35747	6.22023	0.0121958	0.0134129	0.909259	N/A	-1.0998	OKAY
Ubr2	G10	5.48802	5.08414	0.0222814	0.0294795	0.755825	N/A	-1.32306	OKAY
Vhl	G11	5.59565	4.84857	0.0206796	0.0347085	0.595807	N/A	-1.6784	OKAY
Wwp1	G12	4.60695	4.03948	0.0410366	0.0608128	0.674801	N/A	-1.48192	OKAY
Gusb	H01	4.77107	3.53562	0.0366238	0.0862325	0.424711	N/A	-2.35454	OKAY
Hprt	H02	3.84376	3.27646	0.0696485	0.103202	0.674875	N/A	-1.48176	OKAY
Hsp90ab1	H03	0	0	1	1	1	N/A	-1	OKAY
Gapdh	H04	-1.77291	-2.92075	3.41744	7.5724	0.451302	N/A	-2.21581	OKAY
Actb	H05	2.31712	-1.36117	0.200668	2.56893	0.0781134	N/A	-12.8019	OKAY

## Sheet: Data for 3D Profile
3D Profile	A	B	C	D	E	F	G	H
1	0.933889	1.0612	0.639864	0.531719	0.46542	1.22133	1.02333	0.424711
2	0.675975	0.885343	52.8382	0.415572	0.919696	0.931974	0.562937	0.674875
3	0.651738	0.579611	0.650091	0.469643	0.542932	0.464872	0.71776	1
4	1.19039	0.647876	7.57543	27.1684	0.718239	0.668391	0.333497	0.451302
5	0.380418	1.04236	0.881006	0.688696	0.755107	0.497217	0.300029	0.0781134
6	0.317511	0.160641	1.76396	0.104222	0.900944	0.284658	1.55882
7	0.0425982	0.388298	1.22681	0.170779	0.819997	0.583754	0.733049
8	0.682698	0.48651	0.23164	0.242511	0.949831	0.55999	0.679022
9	0.257949	0.736917	0.631268	0.550249	0.022385	1.38392	0.909259
10	0.24927	0.843327	0.713482	0.704793	0.765657	0.824337	0.755825
11	1.02399	1.42224	0.738922	0.0898282	0.793072	0.741508	0.595807
12	0.955139	1.00862	0.116007	0.8976	1.26607	0.481328	0.674801

## Sheet: Scatter Plot
3
The black line indicates fold changes ((2 ^ (-DCt)) of 1. The pink lines indicate the desired fold-change in gene expression threshold, defined by the user with the entry in cell A1.
The scale of the X and Y axes can be adjusted by double clicking on them and then re-formating using the standard functions of Microsoft Excel.									Scatter Plot
									Well	Symbol	2-ΔCt
											H2O2	AL2
									A01	Mul1	0.010844	0.0116117
									A02	Anapc11	0.0681672	0.100843
									A03	Anapc2	0.0362827	0.0556706
									A04	Arih1	0.112277	0.0943201
									A05	Atg7	0.0133018	0.0349662
	1e-05	3e-05	3e-05	1e-05	1e-05				A06	Bard1	0.00070425	0.00221803
	100	300	300	100	100				A07	Brca1	0.000572038	0.0134287
									A08	Brcc3	0.0167179	0.024488
									A09	Btrc	0.010759	0.0417098
									A10	Cbl	0.00975485	0.0391337
									A11	Cdc34	0.221734	0.21654
									A12	Cul1	0.0506691	0.0530489
									B01	Cul2	0.0663122	0.0624877
									B02	Cul3	0.157152	0.177505
									B03	Cul4a	0.0411497	0.0709954
									B04	Cul4b	0.00790603	0.012203
									B05	Cul5	0.0353479	0.0339116
									B06	Cul7	0.0025244	0.0157145
									B07	Ddb1	0.0377773	0.0972894
									B08	Dzip3	0.0034497	0.00709071
									B09	Fbxo3	0.0392849	0.0533098
									B10	Fbxo31	0.0304623	0.0361216
									B11	Fbxo4	0.0297565	0.0209223
									B12	Fbxw10	0.00105445	0.00104545
									C01	Fbxw9	0.0132249	0.0206683
									C02	Hecw1	0.000959175	1.81531e-05
									C03	Hecw2	0.000590005	0.000907573
									C04	Herc6	0.0376294	0.0049673
									C05	Huwe1	0.0902026	0.102386
									C06	March5	0.0782486	0.0443596
									C07	Mdm2	0.158373	0.129093
									C08	Mib1	0.014577	0.0629295
									C09	Mocs3	0.00327308	0.00518494
									C10	Nae1	0.04319	0.0605341
									C11	Nedd8	0.176538	0.238913
									C12	Cul9	0.000562469	0.00484857
									D01	Park2	0.00743065	0.0139748
									D02	Rfwd2	0.00392015	0.00943315
									D03	Rnf123	0.0583222	0.124184
									D04	Rnf148	0.000809235	2.97859e-05
									D05	Sae1	0.0734836	0.1067
									D06	Skp1a	0.0131678	0.126343
									D07	Skp2	0.000937465	0.00548935
									D08	Smurf1	0.00350214	0.0144412
									D09	Smurf2	0.020264	0.036827
									D10	Stub1	0.0685931	0.0973238
									D11	Syvn1	0.00338519	0.0376852
									D12	Tmem189	0.0341355	0.0380298
									E01	Trp53	0.040273	0.0865306
									E02	Uba1	0.22414	0.243711
									E03	Uba2	0.0753376	0.138761
									E04	Uba3	0.0781181	0.108763
									E05	Uba5	0.0248899	0.032962
									E06	Uba6	0.0108815	0.0120779
									E07	Ube2a	0.0344069	0.0419598
									E08	Ube2b	0.456551	0.480665
									E09	Ube2c	0.00634652	0.283517
									E10	Ube2d1	0.144854	0.189189
									E11	Ube2d2	0.0318741	0.0401907
									E12	Ube2d3	0.552461	0.43636
									F01	Ube2e1	0.137012	0.112183
									F02	Ube2e2	0.003827	0.00410633
									F03	Ube2e3	0.0501094	0.107792
									F04	Ube2g1	0.0280504	0.0419671
									F05	Ube2g2	0.0278095	0.0559303
									F06	Ube2h	0.0258671	0.0908708
									F07	Ube2i	0.167864	0.28756
									F08	Ube2j1	0.0339947	0.060706
									F09	Ube2j2	0.000884231	0.000638931
									F10	Ube2k	0.00965994	0.0117184
									F11	Ube2l3	0.0870156	0.117349
									F12	Ube2m	0.0307558	0.0638977
									G01	Ube2n	0.0157239	0.0153654
									G02	Ube2q1	0.0656854	0.116683
									G03	Ube2r2	0.204126	0.284393
									G04	Ube2s	0.0945008	0.283363
									G05	Ube2t	0.00446962	0.0148973
									G06	Ube2w	0.027846	0.0178635
									G07	Ube2z	0.00361073	0.00492564
									G08	Ube4b	0.0175584	0.0258583
									G09	Ubr1	0.0121958	0.0134129
									G10	Ubr2	0.0222814	0.0294795
									G11	Vhl	0.0206796	0.0347085
									G12	Wwp1	0.0410366	0.0608128
									H01	Gusb	0.0366238	0.0862325
									H02	Hprt	0.0696485	0.103202
									H03	Hsp90ab1	1	1
									H04	Gapdh	3.41744	7.5724
									H05	Actb	0.200668	2.56893

## Sheet: Volcano Plot
Threshold for Fold Difference			3		Threshold for p Value of t-test			0.05
The black line indicates a fold-change in gene expression of 1. The pink lines indicate the desired fold-change in gene expression threshold, as defined by the user in the yellow D1 cell.
The blue line indicates the desired threshold for the p value of the t-test, as defined by user in the yellow I1 cell.
The scale of the X and Y axes can be adjusted by double clicking on them and then re-formating using the standard functions of Microsoft Excel.
												Volcano Plot
										Well	Symbol	Log2(FC)	p Value	Comments
										A01	Mul1	-0.098677	#N/A	OKAY
										A02	Anapc11	-0.564958	#N/A	OKAY
	-16	0.05								A03	Anapc2	-0.617635	#N/A	OKAY
	16	0.05								A04	Arih1	0.251431	#N/A	OKAY
										A05	Atg7	-1.39434	#N/A	OKAY
	1	1.58496	-1.58496	0						A06	Bard1	-1.65512	#N/A	OKAY
	#NUM!	1.58496	-1.58496	0						A07	Brca1	-4.55307	#N/A	OKAY
										A08	Brcc3	-0.55068	#N/A	OKAY
										A09	Btrc	-1.95484	#N/A	OKAY
										A10	Cbl	-2.00422	#N/A	OKAY
										A11	Cdc34	0.034195	#N/A	OKAY
										A12	Cul1	-0.066217	#N/A	OKAY
										B01	Cul2	0.085703	#N/A	OKAY
										B02	Cul3	-0.175692	#N/A	OKAY
										B03	Cul4a	-0.786843	#N/A	OKAY
										B04	Cul4b	-0.62621	#N/A	OKAY
										B05	Cul5	0.059847	#N/A	OKAY
										B06	Cul7	-2.63809	#N/A	OKAY
										B07	Ddb1	-1.36477	#N/A	OKAY
										B08	Dzip3	-1.03946	#N/A	OKAY
										B09	Fbxo3	-0.440425	#N/A	OKAY
										B10	Fbxo31	-0.245836	#N/A	OKAY
										B11	Fbxo4	0.508167	#N/A	OKAY
										B12	Fbxw10	0.012379	#N/A	OKAY
										C01	Fbxw9	-0.644163	#N/A	OKAY
										C02	Hecw1	5.72351	#N/A	A
										C03	Hecw2	-0.621286	#N/A	OKAY
										C04	Herc6	2.92133	#N/A	OKAY
										C05	Huwe1	-0.182777	#N/A	OKAY
										C06	March5	0.818817	#N/A	OKAY
										C07	Mdm2	0.29491	#N/A	OKAY
										C08	Mib1	-2.11004	#N/A	OKAY
										C09	Mocs3	-0.663676	#N/A	OKAY
										C10	Nae1	-0.487051	#N/A	OKAY
										C11	Nedd8	-0.436506	#N/A	OKAY
										C12	Cul9	-3.10771	#N/A	OKAY
										D01	Park2	-0.911265	#N/A	OKAY
										D02	Rfwd2	-1.26683	#N/A	OKAY
										D03	Rnf123	-1.09036	#N/A	OKAY
										D04	Rnf148	4.76386	#N/A	A
										D05	Sae1	-0.538061	#N/A	OKAY
										D06	Skp1a	-3.26227	#N/A	OKAY
										D07	Skp2	-2.5498	#N/A	OKAY
										D08	Smurf1	-2.04388	#N/A	OKAY
										D09	Smurf2	-0.861843	#N/A	OKAY
										D10	Stub1	-0.504728	#N/A	OKAY
										D11	Syvn1	-3.47669	#N/A	OKAY
										D12	Tmem189	-0.155855	#N/A	OKAY
										E01	Trp53	-1.1034	#N/A	OKAY
										E02	Uba1	-0.120771	#N/A	OKAY
										E03	Uba2	-0.881157	#N/A	OKAY
										E04	Uba3	-0.477465	#N/A	OKAY
										E05	Uba5	-0.405247	#N/A	OKAY
										E06	Uba6	-0.15049	#N/A	OKAY
										E07	Ube2a	-0.28631	#N/A	OKAY
										E08	Ube2b	-0.074257	#N/A	OKAY
										E09	Ube2c	-5.48133	#N/A	OKAY
										E10	Ube2d1	-0.38523	#N/A	OKAY
										E11	Ube2d2	-0.334477	#N/A	OKAY
										E12	Ube2d3	0.340353	#N/A	OKAY
										F01	Ube2e1	0.288449	#N/A	OKAY
										F02	Ube2e2	-0.101638	#N/A	OKAY
										F03	Ube2e3	-1.10509	#N/A	OKAY
										F04	Ube2g1	-0.581236	#N/A	OKAY
										F05	Ube2g2	-1.00805	#N/A	OKAY
										F06	Ube2h	-1.8127	#N/A	OKAY
										F07	Ube2i	-0.776568	#N/A	OKAY
										F08	Ube2j1	-0.836527	#N/A	OKAY
										F09	Ube2j2	0.468763	#N/A	OKAY
										F10	Ube2k	-0.278694	#N/A	OKAY
										F11	Ube2l3	-0.431465	#N/A	OKAY
										F12	Ube2m	-1.05491	#N/A	OKAY
										G01	Ube2n	0.033272	#N/A	OKAY
										G02	Ube2q1	-0.828955	#N/A	OKAY
										G03	Ube2r2	-0.478426	#N/A	OKAY
										G04	Ube2s	-1.58425	#N/A	OKAY
										G05	Ube2t	-1.73682	#N/A	OKAY
										G06	Ube2w	0.640451	#N/A	OKAY
										G07	Ube2z	-0.448019	#N/A	OKAY
										G08	Ube4b	-0.558469	#N/A	OKAY
										G09	Ubr1	-0.137237	#N/A	OKAY
										G10	Ubr2	-0.403875	#N/A	OKAY
										G11	Vhl	-0.747083	#N/A	OKAY
										G12	Wwp1	-0.567466	#N/A	OKAY

## Sheet: Calculations
		>35 and (N/A or blank) to 35												>35 and (N/A or blank) to 35										Housekeeping Genes																						Normalized ΔCt (Ct(GOI) - Ave Ct (HKG))
Symbol	Well	H2O2										Symbol	Well	AL2										H2O2										AL2										Symbol	Well	H2O2
		exp1	exp2	exp3	exp4	exp5	exp6	exp7	exp8	exp9	exp10			exp1	exp2	exp3	exp4	exp5	exp6	exp7	exp8	exp9	exp10	exp1	exp2	exp3	exp4	exp5	exp6	exp7	exp8	exp9	exp10	exp1	exp2	exp3	exp4	exp5	exp6	exp7	exp8	exp9	exp10			exp1	exp2	exp3	exp4
Mul1	A01	23.2165										Mul1	A01	23.1471										16.6896										16.7188										Mul1	A01	6.52696
Anapc11	A02	20.5644										Anapc11	A02	20.0287																														Anapc11	A02	3.87478
Anapc2	A03	21.4742										Anapc2	A03	20.8858																														Anapc2	A03	4.78458
Arih1	A04	19.8444										Arih1	A04	20.1251																														Arih1	A04	3.15486
Atg7	A05	22.9218										Atg7	A05	21.5567																														Atg7	A05	6.23224
Bard1	A06	27.1612										Bard1	A06	25.5354																														Bard1	A06	10.4716
Brca1	A07	27.4612										Brca1	A07	22.9374																														Brca1	A07	10.7716
Brcc3	A08	22.592										Brcc3	A08	22.0706																														Brcc3	A08	5.90246
Btrc	A09	23.2279										Btrc	A09	21.3023																														Btrc	A09	6.53831
Cbl	A10	23.3692										Cbl	A10	21.3943																														Cbl	A10	6.67966
Cdc34	A11	18.8627										Cdc34	A11	18.9261																														Cdc34	A11	2.1731
Cul1	A12	20.9923										Cul1	A12	20.9554																														Cul1	A12	4.30275
Cul2	B01	20.6042										Cul2	B01	20.7191																														Cul2	B01	3.91458
Cul3	B02	19.3593										Cul3	B02	19.2129																														Cul3	B02	2.66976
Cul4a	B03	21.2926										Cul4a	B03	20.535																														Cul4a	B03	4.60297
Cul4b	B04	23.6724										Cul4b	B04	23.0755																														Cul4b	B04	6.98283
Cul5	B05	21.5118										Cul5	B05	21.6009																														Cul5	B05	4.82223
Cul7	B06	25.3194										Cul7	B06	22.7106																														Cul7	B06	8.62984
Ddb1	B07	21.4159										Ddb1	B07	20.0804																														Ddb1	B07	4.72634
Dzip3	B08	24.8689										Dzip3	B08	23.8587																														Dzip3	B08	8.17931
Fbxo3	B09	21.3595										Fbxo3	B09	20.9483										If no housekeeping gene is chosen, the normalization factor is zero (0).																				Fbxo3	B09	4.66988
Fbxo31	B10	21.7264										Fbxo31	B10	21.5098										Average										Average										Fbxo31	B10	5.03683
Fbxo4	B11	21.7602										Fbxo4	B11	22.2977										16.6896	0	0	0	0	0	0	0	0	0	16.7188	0	0	0	0	0	0	0	0	0	Fbxo4	B11	5.07065
Fbxw10	B12	26.5789										Fbxw10	B12	26.6205																														Fbxw10	B12	9.88929
Fbxw9	C01	22.9302										Fbxw9	C01	22.3153																														Fbxw9	C01	6.2406
Hecw1	C02	26.7155										Hecw1	C02	32.4683																														Hecw1	C02	10.0259
Hecw2	C03	27.4166										Hecw2	C03	26.8245																														Hecw2	C03	10.727
Herc6	C04	21.4216										Herc6	C04	24.3722																														Herc6	C04	4.732
Huwe1	C05	20.1603										Huwe1	C05	20.0068																														Huwe1	C05	3.47069
March5	C06	20.3654										March5	C06	21.2135																														March5	C06	3.67579
Mdm2	C07	19.3482										Mdm2	C07	19.6724																														Mdm2	C07	2.6586
Mib1	C08	22.7897										Mib1	C08	20.709																														Mib1	C08	6.10016
Mocs3	C09	24.9447										Mocs3	C09	24.3103																														Mocs3	C09	8.25513
Nae1	C10	21.2227										Nae1	C10	20.765																														Nae1	C10	4.53316
Nedd8	C11	19.1915										Nedd8	C11	18.7843																														Nedd8	C11	2.50195
Cul9	C12	27.4855										Cul9	C12	24.4071																														Cul9	C12	10.7959
Park2	D01	23.7619										Park2	D01	22.8799																														Park2	D01	7.0723
Rfwd2	D02	24.6845										Rfwd2	D02	23.4469																														Rfwd2	D02	7.99487
Rnf123	D03	20.7894										Rnf123	D03	19.7283																														Rnf123	D03	4.09981
Rnf148	D04	26.9607										Rnf148	D04	31.7539																														Rnf148	D04	10.2712
Sae1	D05	20.456										Sae1	D05	19.9472																														Sae1	D05	3.76643
Skp1a	D06	22.9364										Skp1a	D06	19.7034																														Skp1a	D06	6.24685
Skp2	D07	26.7485										Skp2	D07	24.228																														Skp2	D07	10.0589
Smurf1	D08	24.8471										Smurf1	D08	22.8325																														Smurf1	D08	8.15755
Smurf2	D09	22.3145										Smurf2	D09	21.4819																														Smurf2	D09	5.62494
Stub1	D10	20.5554										Stub1	D10	20.0799																														Stub1	D10	3.86579
Syvn1	D11	24.8961										Syvn1	D11	21.4487																														Syvn1	D11	8.20655
Tmem189	D12	21.5622										Tmem189	D12	21.4356																														Tmem189	D12	4.87258
Trp53	E01	21.3236										Trp53	E01	20.2495																														Trp53	E01	4.63404
Uba1	E02	18.8471										Uba1	E02	18.7556																														Uba1	E02	2.15752
Uba2	E03	20.4201										Uba2	E03	19.5682																														Uba2	E03	3.73049
Uba3	E04	20.3678										Uba3	E04	19.9196																														Uba3	E04	3.6782
Uba5	E05	22.0179										Uba5	E05	21.6419																														Uba5	E05	5.3283
Uba6	E06	23.2116										Uba6	E06	23.0903																														Uba6	E06	6.52198
Ube2a	E07	21.5507										Ube2a	E07	21.2937																														Ube2a	E07	4.86116
Ube2b	E08	17.8207										Ube2b	E08	17.7757																														Ube2b	E08	1.13115
Ube2c	E09	23.9894										Ube2c	E09	18.5373																														Ube2c	E09	7.29982
Ube2d1	E10	19.4769										Ube2d1	E10	19.121																														Ube2d1	E10	2.78733
Ube2d2	E11	21.6611										Ube2d2	E11	21.3558																														Ube2d2	E11	4.97147
Ube2d3	E12	17.5456										Ube2d3	E12	17.9153																														Ube2d3	E12	0.856055
Ube2e1	F01	19.5572										Ube2e1	F01	19.8749																														Ube2e1	F01	2.86762
Ube2e2	F02	24.7192										Ube2e2	F02	24.6468																														Ube2e2	F02	8.02957
Ube2e3	F03	21.0084										Ube2e3	F03	19.9325																														Ube2e3	F03	4.31878
Ube2g1	F04	21.8454										Ube2g1	F04	21.2934																														Ube2g1	F04	5.15583
Ube2g2	F05	21.8579										Ube2g2	F05	20.8791																														Ube2g2	F05	5.16828
Ube2h	F06	21.9623										Ube2h	F06	20.1789																														Ube2h	F06	5.27274
Ube2i	F07	19.2642										Ube2i	F07	18.5169																														Ube2i	F07	2.57463
Ube2j1	F08	21.5681										Ube2j1	F08	20.7609																														Ube2j1	F08	4.87854
Ube2j2	F09	26.8329										Ube2j2	F09	27.3309																														Ube2j2	F09	10.1433
Ube2k	F10	23.3834										Ube2k	F10	23.1339																														Ube2k	F10	6.69377
Ube2l3	F11	20.2122										Ube2l3	F11	19.81																														Ube2l3	F11	3.52258
Ube2m	F12	21.7126										Ube2m	F12	20.6869																														Ube2m	F12	5.023
Ube2n	G01	22.6805										Ube2n	G01	22.743																														Ube2n	G01	5.9909
Ube2q1	G02	20.6179										Ube2q1	G02	19.8182																														Ube2q1	G02	3.92828
Ube2r2	G03	18.9821										Ube2r2	G03	18.5329																														Ube2r2	G03	2.29247
Ube2s	G04	20.0931										Ube2s	G04	18.5381																														Ube2s	G04	3.40353
Ube2t	G05	24.4952										Ube2t	G05	22.7877																														Ube2t	G05	7.80563
Ube2w	G06	21.856										Ube2w	G06	22.5257																														Ube2w	G06	5.16639
Ube2z	G07	24.8031										Ube2z	G07	24.3843																														Ube2z	G07	8.11349
Ube4b	G08	22.5213										Ube4b	G08	21.9921																														Ube4b	G08	5.8317
Ubr1	G09	23.047										Ubr1	G09	22.9391																														Ubr1	G09	6.35747
Ubr2	G10	22.1776										Ubr2	G10	21.803																														Ubr2	G10	5.48802
Vhl	G11	22.2852										Vhl	G11	21.5674																														Vhl	G11	5.59565
Wwp1	G12	21.2965										Wwp1	G12	20.7583																														Wwp1	G12	4.60695
Gusb	H01	21.4607										Gusb	H01	20.2545																														Gusb	H01	4.77107
Hprt	H02	20.5333										Hprt	H02	19.9953																														Hprt	H02	3.84376
Hsp90ab1	H03	16.6896										Hsp90ab1	H03	16.7188																														Hsp90ab1	H03	0
Gapdh	H04	14.9167										Gapdh	H04	13.7981																														Gapdh	H04	-1.77291
Actb	H05	19.0067										Actb	H05	15.3577																														Actb	H05	2.31712
MGDC	H06	35										MGDC	H06	35																														MGDC	H06	18.3104
RTC	H07	35										RTC	H07	35																														RTC	H07	18.3104
RTC	H08	35										RTC	H08	35																														RTC	H08	18.3104
RTC	H09	35										RTC	H09	35																														RTC	H09	18.3104
PPC	H10	18.8049										PPC	H10	18.5398																														PPC	H10	2.11532
PPC	H11	18.6573										PPC	H11	18.5078																														PPC	H11	1.96768
PPC	H12	18.9286										PPC	H12	18.6036																														PPC	H12	2.23904
[truncated: 36 more columns]
